# Supplementary material for: Molecular characterization of the 2022 Sudan virus disease outbreak in Uganda
Source: PubMed Central journal article supplement (PMC10617429; doi:10.1128/jvi.00590-23), 2023-09-26
Supplement: jvi.00590-23-s0004.pdf [file jvi.00590-23-s0004.pdf]

|         |                                                                                                                                                                                                                                                                                                                                                                                                                                                                                                                                                                                                                                                                                                                                                                                                                                                                                                                                                                                                                                                                                                                                                                                                                                                                                                                                                                                                                                                                                                                                                                                                                                                                                                                                                                                                                                                                                                                                                                                                                                                                                                                                                                                                                                                                                                                                                                                                             |
|---------|-------------------------------------------------------------------------------------------------------------------------------------------------------------------------------------------------------------------------------------------------------------------------------------------------------------------------------------------------------------------------------------------------------------------------------------------------------------------------------------------------------------------------------------------------------------------------------------------------------------------------------------------------------------------------------------------------------------------------------------------------------------------------------------------------------------------------------------------------------------------------------------------------------------------------------------------------------------------------------------------------------------------------------------------------------------------------------------------------------------------------------------------------------------------------------------------------------------------------------------------------------------------------------------------------------------------------------------------------------------------------------------------------------------------------------------------------------------------------------------------------------------------------------------------------------------------------------------------------------------------------------------------------------------------------------------------------------------------------------------------------------------------------------------------------------------------------------------------------------------------------------------------------------------------------------------------------------------------------------------------------------------------------------------------------------------------------------------------------------------------------------------------------------------------------------------------------------------------------------------------------------------------------------------------------------------------------------------------------------------------------------------------------------------|
| GP_COOH | NLSEQLRGEELSFEALSNETEDDDAASSRITKGRISDRATRKYSDLVPPKNSPGMVPLHIPEGETTLPSQNSTEGR<br>RVGVNTQETITETAATIIGTNGNHMQISTIGIRPSSNQIPSSSPTTAPSPEAQTPTTHTSGPSVMATEEPTTTPGSS<br>PGPTTEAPTLLTPENITAVKTVLPQESTSNGLITSTVTGILGSLGLRKRSSRRQTNTKATGKCNPNLHYWTAQEQH<br>NAAGIAWIPIYFGPGAEGIYTEGLMHNQNALVCGLRQLANETTQALQLFLRATTELRTYTIILNRKAIDFLLRRWGGTC<br>RILGPDCCIEPHDWTKNITDKINQIHDFFIDNPLPNQDNDDNWWWTGWRQWIPAGIGITGIIIIALLCVCKLLC*                                                                                                                                                                                                                                                                                                                                                                                                                                                                                                                                                                                                                                                                                                                                                                                                                                                                                                                                                                                                                                                                                                                                                                                                                                                                                                                                                                                                                                                                                                                                                                                                                                                                                                                                                                                                                                                                                                                                                                                             |
| GP_NH3  | MGSLSLLQLPRDKFRKSSFFVWVILFQKAFSMPPLGVVNTSTLEVTEIDQLVCKDHLASTDQLKSVGLNLEGSVVS<br>TDIPSATKRWGFRRSGVPPKVVSYEAGWAENCYNLEIKKPDGSECLPPPPDGVRGFPFCRYVHKAQGTGPCPGD<br>YAFHKDGAFFLYDRLASTVIYRGVNFAEGVIAFLILAKPKETFLQSPPIREAVNYTENTSSYYATSYLEYEIENFGAQ<br>HSTTLFKIDNNTFVRLDRPHTPQFLFQLNDTIHLHQQLSNTTGRLIWTLDANINADIGEWAFWENKK                                                                                                                                                                                                                                                                                                                                                                                                                                                                                                                                                                                                                                                                                                                                                                                                                                                                                                                                                                                                                                                                                                                                                                                                                                                                                                                                                                                                                                                                                                                                                                                                                                                                                                                                                                                                                                                                                                                                                                                                                                                                                         |
| L       | MMATQHTQYPDARLSSPIVLDQCDLVTRACGLYSEYSLNPKLRTCRLPKHIYRLKYDTIVLRFISDVPVATIPIDYIA<br>PMLINVLADSKNVPLEPPCLSFLDEIVNYTVQDAAFLNYYMNQIKTQEGVITDQLKQNIIRRVIHKNRYLSALFFWH<br>DLAILTRRGRMNRRGNVRSWFTVNEVVDILGYDYIFWKIPIALLPMNTANVPHASTDWYQPNIFKEAIQGHTHII<br>SVSTAENVLIMCKDLVTSRFNTLLIAELARLEDPVSADYPLVDNIQSLYNAGDYLLSILGSEGYKIIKYLEPLCLAKIQLC<br>SQYTERKGRFLTQMHAVIQTRELLLNRLKKSQLSKIREFHQLLLRLRSTPQQCELFSIQKHWGHPVLHSEKAI<br>QKVKNHATVVKALRPIIFETYCVFKYSVAKHFFDSQGTWYSVISDRCLTPGLNSYIRRNQFPPLPMIKDLLWEFYH<br>LDHPPLFSTKIISDLSIFIKDRATAVEQTCWDAVFEPNVLGYSPPYRFNTKRVPEQFLEQEDFSIESVLQYAQELRYL<br>LPQNRNFSFSLKEKELNVGRTFGKLPYLTRNVQTLCEALLADGLAKAFPSNMMVVTEREQKESLLHQASWHHTS<br>DDFGEHATVRGSSFVTDLEKYNLAFRYEFTAPFINYCNQCYGVRNVFDWMHFLIPQCYMHVSDYNNPPHNVTLE<br>NREYPPEGPSAYRGLGGIEGLQQLWTSISCAQISLVEIKTGFKLRSVAVMGDNQCITVLSVFPLESSPNEQERCA<br>EDNAARVASLAKVTSACGIFLKPDETFVHSQFIYFGKKQYLNQIQLPQSLKTAARMAPLSDAIFDDLQGLTFLASIGT<br>AFERSIETRHLPCRVAFAHFTYFSVRLQHHLGFHKGSDLGQALINKPLDFGTIALS LAVPQVLGGLSFLNPEKC<br>LYRNLGDPVTSGLFQLKHYSVMGMSDIFHALVAKSPGNCSAIDFVLNPGGLNVPGSQDLTSFLRQIVRRSITLSA<br>RNKLINTLFHASADLEDELVCKWLLSSTPVMSRFAADIFSRTPSGKRLQILGYLEGTRTLLASKMISNNAETPILERL<br>RKITLQRWNLWFSYLDHCDPALMEAIQPIKCTVDIAQILREYSWAHILDGRQLIGATLPCIQEQFQTTWLKPYEQC<br>VECSSTNNSPPYVSVALKRNVS AWPDASRLGWITGDGIPYIGSRTEKIGQPAIKPRCPSAALREAIELTSRLTWV<br>TQGSANS DQLIRPFLARVNLVSVQEILQMTPSHYS GNIVHRYNDQYSPHSFMANRMSNTATRLMVSTNTLGEFS<br>GGGQAARDSNIIFQNVINFAVALYDIRFRNTCTSSIQYHRAHIHLTNCCTREVPAQYLYTTTTLNLDSLKYRNNELIYD<br>SEPLRGGGLNCLNLSIDSPLMKGPRLNIIEDDLIRLPHLSGWELAKTVLQSIISDSSNSSTDPISSGETRSFTTHFLTYP<br>KIGLLYSFGALISFYLGNTILCTKKIGLTFEFLYYLQNIHNLSHRSLRIFKPTFRHSSVMSRLMDIDPNFSIYIGGTAG<br>DRGLSDAARLFLRIAISTFLSFVEEWVIFRKANIPLWVIYPLEGQRPDPGPEFLNRVKSIIIGTEDDKNKGSILSRSG<br>EKCSSNLVYNCKSTASNFFHASLAYWRGRHRPKKTIGATNATTAPHIILPLGNSDRPPGLDLNRNNDTFIPTRIKQI<br>VQGDSRNDRTTTTRFPKSRSTPTSATEPPTKMYEGSTTHQGKLTDLHDEHDNAKEFSPNPHRLVVPFFKLTKD<br>GEYSIEPSPEESRSNIKGLLQHLRTMVDTTIYCRFTGIVSSMHYKLDEVLWEYDKFESAVTLAEGEGSGALLLIQKY<br>GVKKLFLNTLATEHSIESEVISGYTTPRMLLSIMPKTHRGELEVLNNSASQITDITHRDWFSNQRNRIPTDADIITM<br>DAETTENLDRSRLYEAVYTIICNHINPKTLKVVLKVFSLDLGDMCWINNYLAPMFGSGYLIKIPITSSAKSSEWYLCL<br>SNLLSLRRTTQHQTQANCLHVVCALQQVQRGSYWLSHLTKYTTSRLHNSYIAFGFPSLEKVLVHRYNLVDSRN<br>GPLVSITRHLALLQTEIRELVTDYNQLRQSRQTQYHFIKTSKGRITKLVNDYLR FELVIRALKNNSTWHHELYLLPELI<br>GVCHRFRNHTRNCTCSERFLVQTYLHRMSDAEIKLMDRLTSLVNMFPPEGFRSSSV* |
| NP      | MDKRVRGSWALGGQSEVDLDYHKILTAGLSVQQGIVRQRIIPVYVVS DLEGICQHIIQAFEAGVDFQDNADSFLLL<br>LCLHHAYQGDHRLFLKSDAVQYLEGHGFRFEVREKENVHRLDELLPNVTGGKNLRRTLAAMPEEETTEANAGQFL<br>SFASLFLPKLVGGEKACLEKVQRQIQVHAEQGLIQYPTSWQSVGHMMVIFRLMRTNFLIKFLLIHQGMHVMVAGHD<br>ANDTVISNSVAQARFSGLLIVKTVLDHILQKTDLGVRLHPLARTAKVKNVSSFFKAALGSLAKHGEYAPFARLLNLS<br>GVNNLEHGLYPQLSAIALGVATAHGSTLAGVNVGEQYQQLREAATEAEKQLQQAETRELDNLGLDEQEKKILMSF<br>HQKKNEISFYQQTNAMVTLRKERLAKLTEAITTASIKVGDYRDDNDIPFPGPPIYDETHPNPSSDDNPDDSDRTTIP<br>GGVVDPYDDESNNYPDYEDSAEGTTGDLDFNLDDDDDDSDQPGPPDRGQSKERAARTHGLQDPTLDGAKKVE<br>LTPGSHQPGNLHITKPLNTNQPQGNMSSTLQSMTPIQEES EPDDQKDDDDDESLSLDSEGEDVESVSGENNP<br>TVAPPAPVYKDTGVDTNQQNGPSNAVDGQGESEALPINPEKRSALEETYYHLLKTQGPFEAINYYHLMSEPIA<br>FSTESGKEYIFPDSLEEAYPPWLSEKEALEKENRYLVIDGQQFFWPVMSLQDKFLAVLQHD*                                                                                                                                                                                                                                                                                                                                                                                                                                                                                                                                                                                                                                                                                                                                                                                                                                                                                                                                                                                                                                                                                                                                                                                                                                                                                                                                                                                                                                                                                                                                                                                                       |
| VP24    | MAKATGRYNLVTPKRELEQGVVFS DLCNFLTPTVQGWKVYWAGLEFDVNQKGITLLNRLKVNDFAPAWAMTRN<br>LPHLFLKNQSEVQTPIWALRVILAAGILDQLMDHSLIEPLSGALNLIADWLTTSTNHFNMRTRQVKDQLSMRM<br>LSLIRSNIINFINKLETLHVVNYKGLLSSVEIGTPSYAIIITRTNMGYLVEVQEPDKSAMDIRHPGPVKFSLHSTLK<br>PVATPKPSSITSLIMEFNSSLAI*                                                                                                                                                                                                                                                                                                                                                                                                                                                                                                                                                                                                                                                                                                                                                                                                                                                                                                                                                                                                                                                                                                                                                                                                                                                                                                                                                                                                                                                                                                                                                                                                                                                                                                                                                                                                                                                                                                                                                                                                                                                                                                                                        |
| VP30    | MERGRERGRSRNSRADQQNSTGPPQFRTRSISRDKTTTDYRSSRSTSQVRVPTVFHKKGTGTLTVPPAPKDICPTL<br>RKGFLCDSNFCKKDHQLESITDRELLLIARKTCGSTDSSLNIAAPKDLRLANPTADDFKQDGS PKLTLKLLVETAEF<br>WANQNINEVDDAKLRALLTSAVLVRKFSKSQLSQCESHLLRRENLGQDQAESVLEVYQRLHSDKGGAFEAALW<br>QQWDRQSLTMFISAFHLVALQLSCSS TVVISGLRLLAPPSVNEGLPPAPGEYTWSEDSTT*                                                                                                                                                                                                                                                                                                                                                                                                                                                                                                                                                                                                                                                                                                                                                                                                                                                                                                                                                                                                                                                                                                                                                                                                                                                                                                                                                                                                                                                                                                                                                                                                                                                                                                                                                                                                                                                                                                                                                                                                                                                                                               |
| VP35    | MQQDRTYRHHGPEVSGWFSEQLMTGKIPLTEVFVDVENKPSAPITIISKNPKTRRKS DKQVQTDDASSLLTEEVK<br>AAINSVISAVRRQTNAIESLEGRVTTLEASLKPVQDMAKTISSLNRS CAEMVAKYDLLVMTTGRATATAAATEAYWS<br>EHGQAPPGPSLYEDDAIKAKLKDPPNGKVPESVKQAYTNLDSTSALNEENFGRPYISAKDLKEIYDHLPGFGTAFH<br>QLVQVICKIGKDNNDIHAEFQASLAEGDSPQCALIQITKRIPAFQDASPPIVHIKSRGDIPKACQKSLRPVPPSPK<br>IDRGWVCIFQFQDGKALGLKI*                                                                                                                                                                                                                                                                                                                                                                                                                                                                                                                                                                                                                                                                                                                                                                                                                                                                                                                                                                                                                                                                                                                                                                                                                                                                                                                                                                                                                                                                                                                                                                                                                                                                                                                                                                                                                                                                                                                                                                                                                                                    |
| VP40    | MKRVTVPTAPPAYADIGYPMSMLPIKSSRAVSGIQKQEVLPGM DTPSNSMRPVADDNIDHTSHTPNGVASAFIL<br>EATVNVISGPKVLMKQIPIWLPLGIADQKTYSDSTTAAIMLASYTITHFGKANNPLVRVNLGQGIPDHPLRLLRM<br>GNQAFLEFVLPVQLPQYFTFDLTALKLVTQPLPAATWTDETPSNLSGALRPGLSFHPKLRPVLLPGKTGKKGH<br>VSDLTAPDKIQTIVNLMQDFKIVPIDPAKSIIGIEVPELLVHKLTKGKKMSQKNGQPIIPVLLPKYIGLDPISPGDLTMI<br>TPDYDDCHSPASCYSYLSEK*                                                                                                                                                                                                                                                                                                                                                                                                                                                                                                                                                                                                                                                                                                                                                                                                                                                                                                                                                                                                                                                                                                                                                                                                                                                                                                                                                                                                                                                                                                                                                                                                                                                                                                                                                                                                                                                                                                                                                                                                                                                        |

ATTTAGTAAGATGACTTAGCGGACACACAAAAAGATAGAAATGTTTCTTAGACTTTTTGTGTGCGAATAAATATG  
GGAAGATTAATCATTTTCTCAAACCTCAAACATAATTAACATTGAGATTGATCTCATCATTTACCAATTGGAGAC  
AATTTAACTAGTCAATCCCCATTTGGGGGCATTCTAAAGTGTTGCAAAGGTATGTGGGTCGTATTGCTTTGCC  
TTTTCTAACCTGGCTCCTCCTACAATTCTAACCTGCTTGATAAGTGTGATTACCTGAGTAATAGACTAATTTCTG  
CCTGGTAATTAGCATTCTTAGTAGAACCATACTATCTCAAGTCTAAGAGAAGGTGAGAAGAGGGTCCCAGG  
TATCCCTCCAGTCCACAAAATCTAGCTAATTTTAGCTGAGTGGACTGATTACTCTCATCACACGCTAACTACTAAG  
GGTTTACCTGAGAGCCTACAACATGGATAAACGGGTGAGAGGTTTATGGGCCCTGGGAGGGCAATCTGAAGTTG  
ATCTTGACTACCACAAAATATTAACAGCCGGGCTTTCCGGTCCAACAAGGGATTGTGCGACAAAGAATCATCCCGG  
TATATGTTGTGAGTGATCTTGAGGGTATTTGTCAACATATCATTCAAGCCCTTTGAAGCAGGCGTAGATTTCCAAGA  
TAATGCTGACAGCTTCTTTTACTTTTACTTTTACTTTTACTTTTACTTTTACTTTTACTTTTACTTTTACTTTTACTTTT  
GATGCAAGTTCAATACTTAGAGGGCCATGGTTTTAGGTTTTGAGGTCCGAGAAAAGGAGAATGTGCACCGTCTGGA  
TGAATTGTTGCCAATGTCACCGGTGAAAAAATCTTAGGAGAACATTGGCTGCAATGCCTGAAGAGGAGACAA  
CAGAAGCTAATGCTGGTCAGTTTTTATCCTTTGCCAGTTTGTCTACCCAAACTTGTCTGTTGGGGAGAAAGCGT  
GTCTGGAAAAAGTACAAAGGCAAATTCAGGTCCATGCAGAACAAGGGCTCATTCAATATCCAACTTCTGGCAAI  
CAGTTGGACACATGATGGTGATCTTCCGCTTGATGAGAACAACCTTTTAAATCAAGTCTCTACTAATACATCAGG  
GGATGCACATGGTCGCAGGCCATGATGCGAATGACACAGTAATATCTAATTCTGTTGCCAAGCAAGGTTCTCTG  
GTCTTCTGATTGTAAGACTGTTCTGGACCACATCTACAAAAAACAGATCTTGAGGTACGACTTTCATCCACTGG  
CCAGGACAGCAAAAGTCAAGAATGAGGTCAGTTCATTCAAGGCAGCTCTTGCTCACTTGCCAAGCATGGAGAA  
TATGCTCCATTTGCACGTCTCCTCAATCTTTCTGGAGTCAACAACCTTGAACATGGGCTTTATCCACAACCTCTCA  
GCCATTGCTTTGGGTGTTGCAACTGCCACGGGAGCACGCTGGCTGGTGTAAATGTAGGGGAGCAATATCAGCA  
ACTGCGTGAGGCTGCTACTGAAGCTGAAAAGCAACTCCAACAATATGCTGAAACCCGTGAGTTGGACAACCTTG  
GGCTTGATGAACAGGAAAAGAAGATTCTCATGAGCTTCCACCAGAAGAAGAATGAGATCAGCTTCCAGCAAACCT  
AACGCAATGGTAACCTTGAGGAAAGAGCGGCTGGCCAAGCTGACCGAAGCCATCACGACTGCATCAAAGATCA  
AGGTTGGAGATCGTTATCCTGATGACAATGATATTCCATTTCCCGGGCCGATCTATGATGAAACCCACCCCAACC  
CTTCTGATGATAATCCTGACTGATGATTACGTGATACAACGATCCCAGGTGTTGTTGTTGATCCGTATGATGAGA  
GTAATAATTACTGACTACGAGGATTCGGCTGAAGGCACCACAGGAGATCTTGATCTTTCAATTTGGACGACG  
ACGATGACGACAGCCAACAGGACCACCAGACAGGGGGCAGAGCAAGGAGAGAGCAGCTCGGACACATGGCC  
TCCAAGATCCGACCTTGACGAGGAGCGAAAAAGGTGCCGGAGTTGACCCAGGTTCCACCAACCAGGCAACCT  
CCACATCACCAGCCGGGTTTAAACACCAACCAACCAAGGCAATATGTCATCTACTCTCCAGAGTATGACCCC  
TATACAGGAAGAATCAGAGCCCAGTATGATCAGAAAGATGATGATGATGAGAGTCTCACATCCCTTGACTCTGAAG  
GTGACGAAGATGTTGAGAGCGTATCAGGGGAGAACAACCCAACTGTAGCTCCACCAGCACCAGTCTACAAGGAT  
ACTGGAGTAGACACTAATCAGCAAAATGGACCAAGCAATGCTGTAGATGGTCAAGGTTCTGAAAGTGAAGCTCT  
CCCAATCAACCCCGAAAAGAGATCTGCACTGGAAGAAACATATTATCATCTCTAAAACACAGGGTCCATTTGA  
GGCAATCAATTATTATCACCTAATGAGTGATGAGCCATTGCTTTTAGCACTGAAAGTGGCAAGGAATATATCTTC  
CCAGATTCTTTGAAGAAGCCTACCCGCCTTGTTGAGTGAGAAGGAGGCCTTAGAGAAAAGAAAATCGTTATCT  
GGTCATTGATGGCCAGCAATTTCTTGCCAGTAATGAGCCTACAGGACAAGTTCCTTGCTGTTCTTCAACATGA  
CTGAGGACCCATGATTAGTAGATTTTGTATTCTGAGCTTGATTATAATTGTTTTGATAATTCAAGTATGAGCACC  
CAACCCGAAATATAAACCTATTTTAGTTATGAGGAAATTAATAAATAATCTGTAAGTTGTAGGACTATGAAGAG  
CTGCTTGTGTCAATTTATCACGGGTTAATACCCATACCCGAAGAATAATTTTAGTAATTTAATCAGCTTATAAT  
ATGTACCAATAGGAAAACATTATAGCATTAAAACATAAAGTATCCTTCGATGAGCTTAGGAGGATAATATCCTGAT  
GAATCTATAGAGCTTAGGATTAAGAAAAAATTATGATGAAGATTAAAAACCTTATCATCTTTAAAAAGAGAGC  
TATTCTTTATCTGAATTCCTTATTAATGTCTAAGAGCTATTATTTGTACCCTCTTAGCTAGACACTGCCAACAA  
TATAAGCCATGCAGCAGGATAGGACTTATAGACATCATGGACCCGAAGTGTCTGGCTGGTTTTCTGAGCAATTA  
TGACCGGCAAAATACCGCTAACAGAGGTGTTTGTGATGTTGAAAACAAACCAAGTCTTGCCCCGATAACCATTA  
TTAGTAAGAATCCCAAGACAACACGTAAGAGTGAAGCAAGTCCAACAGATGATGCCAGTAGCTTATTGACAG  
AAGAAGTCAAGGCTGCCATAAATTCGGTGATATCAGCTGTGCGTCGGCAAACCAATGCCATTGAATCACTAGAA  
GGTCGAGTAACAACCTTTGAGGCCAGCTTAAAACCAGTTCAGACATGGCAAAGACCATATCATCCCTGAATCG  
CAGCTGTGCCGAAATGGTTGCAAAATACGACCTACTGGTGATGACCACTGGGCGAGCAACTGCCACTGCTGCAG  
CAACAGAAGCATATTGGAGTGAACATGGACAAGCACCTCCAGGCCATCATTGTACGAGGATGATGCTATTAAG  
GCTAAATTGAAAGATCCGAACGGGAAGGTTCCAGAAAGTGTCAAACAGGCCTACACAAATCTAGATAGCACAAAG  
TGCCCTCAATGAGGAAAATTTCCGGGCGACCTTACATTTAGCAAAAAGATCTCAAGGAAATCATCTATGACCATCT  
CCCAGGATTTGGGACAGCTTTTATCAGTTGGTGCAGGTTATCTGCAAAATTGGTAAGGATAATAATATCCTAGA  
CATAATTCATGCAGAATCCAAGCAAGCTTGGCTGAGGGAGACTCCCCCAGTGTGCATTAATCCAGATAACAAA  
ACGGATCCCTGCTTTCAAGATGCCTCTCCTCCAATTGTGCATATCAAGTCTCGAGGAGATATACCCAAAGCCTG  
TCAGAAAAGCCTCCGGCCGGTCCCACCGTCACCAAAGATCGATAGAGGTTGGGTCTGTATTTTCAATTCCAAG  
ACGGGAAGGCCCTTGGGCTAAAAATATGATACAGAAGCAAGGTAAGCTCATTGTCGATGGCCAAATGATACTTA  
TGACTGTTCAAATCAAGTTAGACTAATAGTTTATCATGTATAAGCTTATAAGTCAAGTTTTAAATTTCCCCTAT  
CCTAATCAATTGATAATGCTGTCAATAGGAAATCCCCTGTATTGTAATAAGACCTCATTAAACATATTTCCCCTGC  
TTAGTACTATGCAGAAACCCCGAGCAAATTAATAATGATGAAGATTAAGAAAAAGAGGGATTTTCTCAGGAAAA  
ATCTTTTTTCTTACCTTCATCTCATTAAACAATTTAGGACTCAGGAAAAATGAAAAGGGTCACTGTGCCGACTG  
CACCACCTGCCTATGCTGACATTGGCTATCCTATGAGCATGCTTCCCATCAAGTCAAGCAGGGCTGTGAGTGGAA  
TTCAACAGAAAACAAGAGGTCTTCCCTGGAATGGATACACCATCAAATTCATGAGACCTGTTGCTGATGATAACA  
TTGATCATAACAAGTCATACCCCGAACGGAGTGGCCTCAGCATTATCTTGGAGGCAACTGTCAATGTGATCTCGG  
GGCCCAAAGTCTCATGAAACAATCCCTATTTGGTTGCCACTCGGAATTGCTGACCAAAAAACGTACAGTTTTG  
ACTCAACAACAGCAGCAATTATGCTCGCATCTTATACGATCACCCATTTTGGAAAGGCCAACAAACCCCTCGTTA  
GAGTGAATCGACTTGGTCAGGGAATACCGGATCACCCACTCAGATTGCTCAGGATGGGGAACCAGGCTTTCTT  
CAAGAGTTTGTGCTACCACAGTTCAACTGCCGCAATATTTACTTTTGATCTGACTGCACTCAAATTAGTGACA  
CAGCCTCTCCCTGCTGCAACATGGACAGATGAGACTCCGAGCAACCTTTAGGAGCACTTCGTCCCGGGCTTTC  
ATTTACCCAAAGCTGAGACCCGTTCTACTTCCAGGCAAAACGGGAAAGAAAGGGCATGTTTCTGATCTGACTG  
CCCCAGACAAAATTCAGACAATTGTGAACCTGATGCAAGATTTCAAATCGTGCCAATTGATCCAGCTAAGAGTA  
TCATTGGGATCGAGGTTCCAGAATTGCTGGTCCACAAGCTCACCGGGAAGAAAATGAGTCAGAAGAATGGACAG  
CCTATAATTCCTGTCTTACTTCCAAAATACATTGGGCTAGATCCAATCTCACCTGGAGACCTGACTATGGTCATAA

CACCAGATTATGATGATTGTCATTACCTGCCAGTTGCTCTTATCTCAGTGAAAAGTGATTCTCACAAAGTGAGA  
GAAACACCTCCAGTAAAGAAATCAAATCTTATCTATAGCAACTCAATCGACTTTTAGGAAGCTAGCAGTACATATA  
CTATGGGACAACCTCAACCCCTCTGTTAAAATGACTAATCGGTTCAAGGAACTCTCACTGATCAAGCCTGAATCC  
AAGATAGAACCAGCCAAAGGGCCCCCAGAGTCTCCACAAGCTTAGCCAATCAATTAACATGCATAAGCGA  
TCCATACTTCGCCAATCAGTGTCCGATGTTACCCCTTCAAGCCTCCTTCTAGCAAATTGACCTAGCTGTACC  
AAGAGATTCCCTCAGCCTCCTTCTCAAATAACCTGATCCTTGAGGGTTATACCTTACCACCTTTATGCTCATTTC  
CCCAAACATAAAATGAAATGTCTTAACATGATTGCACCATTAAGAAAAACAAATCTGATGAAGATTAAGCCTGATT  
AAGGCCAACCTTCATCTTTTTACCATAATCTTGTTCTCAGTACCATTGATAAGGGTACACTTGCCAAAACGCC  
CCATCCTAAGGGTCTCGCAATGGGAGTCTTAGCCTACTCCAATGCCAGGGACAATTCGGAAAAAGCTCTTT  
CTTTGTTGGGTGTCATCTTATTCCAAAAGCCCTTTCCATGCTTTGGGTGTTGTGACTAACAGCACTTTAGAA  
GTAACAGAGATTGACCAGCTAGTCTGCAAGGATCATCTTGATCTACTGACCAGTGAATCAGTTGGTCTCAAC  
CTCGAGGGGAGCGGAGTATCTACTGATATCCCATCTGCAACAAGCGTTGGGGCTTCAGATCTGGTGTCTCCTCC  
CAAGTGGTGCAGCTATGAAGCGGGAGAATGGGCTGAAAATTGCTACAATCTTGAATAAAGAAGCCGGACGGGA  
GCGAATGCTTACCCCCACCGCCAGATGGTGTGAGAGGCTTTCGAAGTGGCGCTATGTTACAAAAGCCCAAGGA  
ACCGGGCCCTGCCAGGTGACTACGCCTTTCATAAGGATGGAGCTTTCCTCTATGACAGGCTGGCTTCAAC  
TGTAATTTACAGAGGAGTCAATTTTGTGAGGGGGTAATTGCATTCTTGATATTGGCTAAACCAAAGAAACGTT  
CCTTCAGTACCCCCATTTCGAGAGGCAGTAACTACACTGAAAATACATCAAGTTATTATGCCACATCTACTTG  
GAGTATGAAATCGAAAATTTGGTGCTCAACACTCCACGACCCTTTTCAAATTGACAATAATACTTTTGTTCGTC  
TGGACAGGCCCCACACGCCTCAGTTCCTTTCCAGCTGAATGATACCATTACCTTACCACAGTTGAGTAATA  
CAACTGGGAGACTAATTTGGACACTAGATGCTAATATCAATGCTGATATTGGTGAATGGGCTTTTTGGGAAAATA  
AAAAATCTCTCCGAACAACACTACGTGGAGAAGAGCTGTCTTTCGAAGCTTTATCGCTCAACGAGACAGAAGACG  
ATGATGCGGCATCGTCGAGAATTACAAAGGGGAAGAATCTCCGACCGGGCCACCAGGAAGTATTCGGACCTGGTT  
CCAAAGAATTCCTGGGATGGTTCATTGCACATACCAGAAGGGGAAACAACATTGCCGTCTCAGAATTCGAC  
AGAAGTGAAGAGTAGGTGTGAACACTCAGGAGACCATCACAGAGACAGCTGCAACAATTATAGGCACTAACG  
GCAACCATCTCAGATCTCCACCATCGGGATAAGACCCGAGCTCAACCAAATCCGAGTTCTCACCAGCACG  
GCACCAAGCTGAGGCTCAGACCCCAACAACCCACACATCAGTCCATCAGTGGTGGCCACCGGAGGAACAA  
CAACACCACCGGAAGCTCCCCGGCCCAACAACAGAAGCACCCTCTCACCACCCAGAAAATATAACAACA  
GCGGTTAAAATGTCTGCCACAGGAGTCCACAAGCAACGGTCTAATAACTTCAACAGTAACAGGAATTCTTGG  
GAGTCTTGGGCTTCGAAAACGCAGCAGAAGACAAACTAACACCAAAGCCACGGGTAAGTGAATCCCAACTTAC  
ACTACTGGACTGCACAAGAACAACATAATGCTGCTGGAATTGCCTGGATCCCGTACTTTGGACCGGGTGCGGAA  
GGCATATACACTGAAGGCCTGATGCATAACCAAATGCCTTAGTCTGTGGACTTAGGCAACTTGCAAATGAAACA  
ACTCAAGCTCTGCAGCTTTTCTTAAGAGCCACAACGGAGCTGCGGACATATACCATACTCAATAGGAAGGCCATA  
GATTTCTTCTGCGACGATGGGGCGGGACATGCAGGATCTGGGACCAGATTGTTGCATTGAGCCACATGATTG  
GACAAAAACATCACTGATAAAATCAACCAAATCATCCATGATTTATCGACAACCCCTTACCTAATCAGGATAAT  
GATGATAATTGGTGGACGGGCTGGAGACAGTGGATCCCTGCAGGAATAGGCATTACTGGAATTATTATTGCAATT  
ATTGCTCTTCTTTGCGTTTGCAAGCTGCTTTGCTGAATATCAATTTGAATCATCAATTAAGCTTGATACATTTCTA  
GCATTTTAAATTATAAACCATACTGATACTTGAAAATCAGGCTAATGCCAAGTTCTGTGCAAAACTTGAAAGTAG  
GTTTACAAAATCCTTTGAACTGGAATGCTTTGATACTCTTCTCAATACTATATAAGTTCTTCCCAAGAATAATA  
TTGATGAAGATTAAGAAAAAGTGACATTGTGCCACTTTTGAATCTTCATCCACCTACACATTCAATTCAGGAA  
TCTTTGAATTAACCCTCACACTTGCTTAGGAAAGAGCCTATCCTCTACAAGAATCCCGAGGCGGCAATTCAGTTA  
ATTTCATATAAAGATAATCCATTTCCAAGCACACAGATAACTATATTATTAATCTTTACCACAAATATGGAGAG  
GGTCTGAGCGCGGAGATCAAGGAATCACGTGCCAGCAGCAAAATCAACAGTCTCAATTTAGGACAAG  
ATCCATTTCCCGGATAAGACAACAACAGACTACCGTAGTAGTCAAGTACTTTCGCAAGTTAGAGTCCCTACGGT  
TTTTCATAGAAGGTAAGTACTGGGACCCTTACTGTCCCTCCAGCACCTAAGGATATTTGTCTACTCTCAGAAAAGG  
ATTTCTATGTGATAGTAATTTCTGTA AAAAGGACCATCAACTTGAAAGCCTAACCGACCGGGAGCTCCTACTTCTT  
ATAGCACGGAAGACCTGTGGATCAACTGATTATCGCTTAATATAGCTGCTCCTAAAGACCTAAGACTAGCAAAT  
CCTACGGCTGATGACTTCAAGCAAGACGGCAGTCCAAAATTAACCCTAAAATTAAGTCTGAGACTGCTGAGTTT  
TGGGCCAATCAGAATATTAATGAAGTAGATGATGCAAACTCCGTGCTCTCTTGACGTTGAGTGTCTTGTAGTG  
CGGAAATCTCTAAGTACAGCTTAGTCAATTATGTGAGAGTCACTTAGGAGGGAAAACCTTAGGACAAGACCAA  
GCTGAATCAGTTCTCGAGGTTTATCAACGTTTACATAGTGATAAAGGAGGTGCTTTTGGGACGACTATGGCAA  
CAGTGGGATAGACAATCATAACTATGTTTATATCTGCTTTCCTCCATGTAGCATTGCAACTTTCCTGTGAGAGCT  
CCACTGTAGTGATATCAGGCCTACGCTTACTTGCCCCCAAGCGTTAATGAAGGGCTCCCTCCTGCACCAGGG  
GAATATACTTGGTCAGAAGATAGTACAACCTTAGCCTGTAGGGAGGACAAGTAAAACAAGATGCCCTTATCCTCTA  
TAGATGGTATTTTTAAAGAGGAGGACAGGATAGGAATAAAGATAATGACTAAAGCCAATATAAAGATACGAACAC  
AAGTAGAAATTAATAAGAAATCAAAACAATCTCCCCCTTATTCAATATGAAATATAATAGTGAGTATTTGTTTCATA  
ATGTCAATCATTATTGTTAAAATAAACAAGTCAAGTCAAGAGTGTAGGATCGTTATATTGCAAGGATCCTCCCT  
AGAAGCGTTGAATCATCTCAAGTAGCCTAGAACAAGAAGCAGCAGAACATTAATGAAATAGATAATAAAGGAT  
CGCTTGTTTTTAAGATAGTTTTAGGAAGTTTTAAAATTAAGAAAAAGAACTCATGGACACACTCTAGCATTGAGGA  
TGGGGTTCCCTTGATGATAGTATAGTCTTAGGTATAGGGTAGTCTACAGTCTATATTATACAGTCTAAACTTG  
TAAAATTAACACTACAAGAACATGATGAAAATTAATGAGAAGGTTCCAAGATTGACTTCAATCCAAACACCTTGCT  
CTGCCAATTTTCATCTCCTTAAGATATATGATTCTGTTCTGCGAGATAAGGTTATCAATAGGGTGTGTATCTCTT  
TTACATATTTGGGCTCCCACTAGGCTAGGGTTTATAGTTAAGGAAGACTCATCACATTTTTTATTGAACTAGTCTA  
CTCGCAGAATCCCACCGGGAATAGAAATTAGAACATTTGTGATACTTTGACTATAGGAAATAATTTTCAACACTAC  
CTGAGATCAGGTTATTCTTCCAACCTTATTCTGCAAGTAATTGTTTAGCATCATAACAACAACGTTATAATTTAAGAA  
TCAAGTCTTGTAACAGAAATAAAGATAACAGAAAGAACCCTTACTATACGGGTCCATTAATTTTATAGGAGAAGCT  
CCTTTTACAAGCCTAAGATTCCATTAGAGATAACCAGAATGGCTAAAGCCACAGGCCGGTACAACCTTGGTAACAC  
CAAACCGGGAGCTAGAGCAAGGAGTTGTGTTTAGCGACCTATGCAACTTCTAGTGACTCCAACCTGTGCAAGGA  
TGGAAGGTTTACTGGGCTGGACTTGAGTTTGACGTCAACCAAAGGGTATTACCCTGTTAAATCGTCTTAAAGTG  
AATGATTTTGTCTCCTGCATGGGCGATGACCCGGAACCTCTCCACACTTGTTCAAAACCAACAGTCTGAAGTC  
CAAACCTCCATTTGGGCTTTGAGGGTAATTCTTGCCGCGGGATTCTTGACCAATTAATGGATCATTCCCTCATT  
GAGCCGCTATCAGGGGCCCTGAACCTAATTGCTGATTGGTTACTAACAACATCTACTAATCACTTCAACATGAGA  
ACTCAACGAGTAAAGGACCAACTGAGCATGAGGATGTTATCTCTTATAAGGTCAAATATTATTAACCTTTATAAATA

AGCTCGAGACTC...CATGTCGTTAATTACAAGGGACTTCTAAGCAGTGTGGAGATAGGAACACCAAGCTATGCAA  
TCATTATTACCAGGACTAATATGGGTTATCTTGTGCGAGGTTGAGGAAACAGATAAATCTGCGATGGATATACGACA  
CCCTGGTCTGTCAAATTCTCCCTACTACATGAATCGACACTTAAACCTGTTGCCACTCCTAAACCGTCAAGCATT  
ACTTCATTGATCATGGAGTTC AACAGTTCTCTGGCAATTTAATTGCCGTAATAAAAATTGTACGATAGGGGCTAACA  
TTGATTCCATAATCCATTGTAGGACAGAATCATTTCCTGTATGATCTTAGTTTAAATCTCTCTTTATACAATGATGA  
ATAAGGAGCTTGTAAAAATGTTACAAAAGTATACTGTTTGAACCCCTAGTATCCCTGTAAATATCCTCATTCAAT  
TTTTGTTTTTACATGTGTAGTCACTGTATAGCATGACCCTAGTCATGCCTCTAATTAATACTTAATCTAACAGTTA  
ATATAATGTATAACTTTCCATGTTCAAAGAGTAGTCAAACAATGTGAGATCCAGTTTCACTCACAGCATCTATTC  
ACTATTTACAGTATGATGAGGCCAAATTAACACAGTAGAGGTCTAGATTTAATAAGAACGAGGAAGATTAAGAA  
AAGTCCATAATGCTGGGGAGGCAATCCCTGCCACCATAGGACTTTTTCAATTCCTATTTTTATGATGGTACCC  
AACATACACAATATCCTGATGCAAGATTGCTTCCCCAATTGTCTTAGACCAATGTGACCTAGTGACAAGAGCAT  
GTGGACTTTACTCTGAGTATTGCTGAACCCCTAACTAAGGACATGCCGTTTACCGAAACATATCTATAGATTA  
ATATGACACTATTGTTTTACGATTTATTAGTGATGTCCTGTAGCTACAATCCCAATAGACTACATTGCTCCGATGT  
TAATAAATGTTCTGGCAGATAGTAAAAATGTACCATTGGAACCTCCCTGCTTGAGTTTCTTGGATGAAATAGTCAA  
TTATACCGTGCAGGATGCAGCATTCTTAATTATTACATGAATCAGATTAACACAGGAAGGAGTAATTACAGAT  
CAATTAACACAGAACATTCTGAGGGTCACTCACAAAAACAGATATCTATCTGCTCTATTCTTCTGGCATGATCTTG  
CCATCCTCACCCGTCGAGGGAGAATGAACCGAGGAAATGTGCGCTCCACTTGGTTTGTAAACGAATGAGGTTGTT  
GACATTCTAGGATATGGTGATTATATCTTCTGGAAGATCCCTATTGCTCTATTACCAATGAACACAGCTAATGTT  
CACATGCATCAACTGACTGGTACCAACCTAATATCTTCAAGGAGGCTATTCAAGGACACACACATATTATTTCA  
CTCTACAGCCGAGGTCCTTATTATGTGTAAGGATCTTGTACAAGTCGTTTTAATACCCTTCTGATTGCTGAGTTA  
GCCAGGTTGGAAGATCCAGTGTCTGCTGATTATCCACTAGTAGATAATATTCAATCTCTGTATAACGCAGGAGACT  
ACCTGTTGTCCATATTGGGATCAGAGGGGTACAAAATAATCAAATATCTCGAACCTCTGTGTTTGGCTAAGATT  
AACTATGTTCCCAATATACAGAACGAAAAGGGCGGTTTTAACCAGATGCATCTTGCAGTTATTCAAACATTGC  
GTGAACTCCTCCTAATAGAGGGTTGAAAAATCACAATTGTCTAAAATCCGCGAGTTTCAACCACTGTTGCTCA  
GACTCCGATCCACACCACAACAATTATGTGAATTTTCAATCCAAAACACTGGGGCCACCCAGTTCTGCATA  
GTGAAAAGGCCATCCAAAAGGTTAAAAATCATGCAACAGTTCTAAAGGCATTGCGGCCGATTATCATCTTTGAAA  
CGTATTGTGATTCAAGTATAGTGTGGCAAAAACATTTCTTTGATAGTCAAGGCACCTGGTACAGTGTGATATCAGA  
CCGATGTTTAAACGCCGGGATTGAATTCCTACATTAGGCGAAATCAATTCCCTCCACTTCCAATGATCAAAGATCT  
TTATGGGAATTTTACCATTGGATCATCCTCCATTATTCTCCACGAAGATCATTAGTGACCTCAGCATTTCATTA  
AGACCGCGCAACAGCAGTTGAACAAACCTGTTGGGATGCAGTTTTGAGCCTAACGTTTTGGGCTACAGTCCAC  
CTTATCGATTCAATACCAACGTGTACCTGAACAATTCTGGAGCAAGAGGATTTTTCTATTGAGAGTGTCTTACA  
ATACGCCCAAGAACTTAGGTACTTATTGCCCCAGAATCGAAATTTTTCTTTTTATTGAAGGAAAAAGAATTAAT  
GTTGGTAGGACATTTGAAAATTGCCTTATTTAACAGGAATGTCAAACCCCTCTGCGAAGCATTACTTGCAGAT  
GGTTTGGCTAAAGCCTTCCAAGCAATATGATGGTTGTACAGAGAGGGAACAAAAGGAGAGCCTCCTCACCA  
AGCATCCTGGCACCATAAAGTATGATGATTTCCGAGAGCATGCCACAGTTCGTGGAAGTAGTTTTGTACAGACC  
TGGAAAATACAATCTGGCCTTCAAGGATGAATTCACAGCTCCCTTCACTAATATTGCAACCAATGCTATGGGG  
TTCGCAATGTCTTTGATTGGATGCACTTCCCTAATTCGCAATGTTACATGCATGTTAGTGATTATTATAACCCACC  
ACATAATGTAACCTTAGAGAATAGGGAATATCCCCCGAAGGACCAAGTGCTTATAGAGGGCCACCTTGGCGGTAT  
TGAGGGGCTTCAACAAAAGTTATGGACTAGTATCTCATGTGCTCAAATCTCATTGGTAGAGATCAAGACCGGGT  
CAAATTGCGATCAGCAGTCAAGGGGATAATCAATGTATTACAGTATTATCAGTCTTTCCACTAGAATCTAGTCCG  
AATGAGCAGGAGAGATGCGCAGAAGACAATGCAGCCAGAGTGGCTGCTAGCTTGGCCAAAGTCACAAGTGCCT  
GTGGGATATTCTCAAGCCTGATGAGACTTTTTGTACACTCAGGCTTATCTATTTTTGGCAAAAAGCAATACTTGA  
CGGAATTC AATTACCTCAACTACTCAAGACAGCAGCTAGGATGGCCCTCTCTCAGATGCAATTTTTGATGACTT  
GCAAGGTACACTTGGCAGTATAGGAACTGCCTTTGAGCGATCAATCTCCGAAACTAGACATTTTTACCATGTCG  
TGTTGCAGCTGCCTTTCATACATATTTCTCTGTTGCGGATCTTACAACATCATCACCTTGGTTTCCATAAGGGTTC  
GACCTTGGACAATTGGCAATCAATAAACCTCTTGATTTGGAACCATGCACTATCCTTAGCAGTTCCTCAGGTAT  
TGGGTGGATTATCCTTCTAAATCCAGAAAAGTGCCTTTATCGCAACTTGGGTGATCCTGTAACCTCAGGCCTAT  
TTCAGTTGAAGCATTATCTGTCAATGGTGGGTATGAGTGATATCTTTCATGCACTTGTGCAAAAAGCCCAGGGA  
ATTGTAGCGCAATTGACTTTGTTCTAAACCCAGGCGGGTAAATGTCCCTGGATCACAGGATTTAACATCTTTCC  
TTCGTCAGATTGTGAGAAGGAGTATCACACTTTCGGCAAGAAACAAGTTAATCAACACGTTATTTACGCTTCTG  
CAGATCTTGAAGACGAGTTAGTATGTAATGGTTACTTTCTTCAACGCCCGTATGAGCCGTTTCGCGAGCCGAT  
TTTTCTCACGAACACCAAGCGGGAAAAGATTACAAATCTTGGGATACCTCAGAGGGAACCAGAATTTATTAGCAT  
CCAAAATGATAAGCAATAATGCAGAGACACCAATCTTGGAGAGGCTCAGAAAAATAACGCTTCAAAGATGGAATC  
TATGGTTTAGTTACCTAGACCATTGTGACCCAGCTTTAATGGAAGCAATTCAACCAATTAAGTGTACTGTTGATAT  
TGCTCAAATCTTAGAGAATACTCCTGGGCTCATATTCTTGATGGTAGACAGTTAATAGGGGGCAACACTGCCATG  
TATACCTGAGCAGTTCAAACCACATGGTAAAAACCTTACGAGCAATGTGTGGAATGTTCAACCAACAATTC  
TAGTCCATATGTATCAGTTGCATTAATAAAGGAACGTGTTAGTGCTTGGCCTGATGCGTCTAGATTGGGGTGGAC  
GATTGGTGATGGGATTCCTACATAGGCTCAAGAAGTCAAGGACTGAGGACAAGATAGGTCAGCCGCTATTAAGCCGAGGT  
GCCACTCAGCTGCATTAAGAGAAGCTATTGAATTGACCTCTAGGTTGACCTGGGTCACTCAAGGTAGTGCAAAC  
AGCGATCAGTTAATTCGCCCTTTTCTTGGAGCAAGAGTAACTTGTAGTGTAACAAGAGATTCTCAAATGACCCCC  
TCACATTACTCCGTAATATTGTGCATCGGTATAATGATCAGTATAGCCCTCACTCCTTTATGGCTAACC GCATGA  
GTAACACAGCAACGCGCTTGTGGTATCTACCAACACACTAGGAGAGTTTTCCGGAGGGGGTCAAGGCTGCACGT  
GATAGCAACATTATATTTCAAATGTGATTAACCTTGCAGTGGCCTTGTATGACATTAGGTTTCCGGAACACTTGT  
CATCTTCTATTCAATATCACAGGGCCCATATTACCTGACGAATTGTTGTACGAGGGAAGTACCGGCCCAATACT  
AACATACACAACCACGCTAAATCTAGATTTGAGTAAGTACCGTAATAATGAACTGATTTATGATTACAGAGCCACTA  
AGAGGAGGTCTCAACTGCAACTTATCGATTGACAGTCTTTGATGAAGGGGCCACGTTTAAATATTATTGAGGAT  
GACTTAATACGGTTGCCACATTTATCCGGCTGGGAATTAGCAAAAACAGTCTTGAATCAATAATCTCTGATAGTA  
GCAATTCATCAACAGATCCATTAGCAGCGGTGAAACAAGATCCTTCAACACCCACTTCTTAACGTATCCCAAAA  
TAGGGCTCCTATACAGTTTTGGAGCCCTCATAAGTTTTTATTTGGGTAATACTATTCTGTGCACGAAAAGATCGG  
ACTCACAGAATTTCTATACTATCTCCAGAATCAGATCCACAACCTTATCACACAGATCCCTTGAATCTTCAAACCG  
ACATTTAGACACTCAAGTGTATGTCAGGTTGATGGATATAGACCCCAACTTCTCAATATATATTGGTGGGACTG  
CAGGTGACCGTGGATTATCGGACGCTGCAAGATTATTTCTCCGAATTGCAATTTCAACTTTCTGAGCTTTGTTG

AGGAGTGGGTTACTTTAGGAAGGCAAACATCCCCTATGGGTTATCTATCCTCTCGAAGGCCAACGCCCTGATC  
CTCCTGGCGAATTTTTGAACCGAGTAAAATCTCTAATTATTGGGACTGAAGATGATAAAAATAAAGGTTCTATACT  
TTCAAGATCTGGAGAGAAATGCTCTTCAAATTTAGTTTATAATTGCAAGAGTACAGCAAGCAATTTTTCCATGCA  
TCATTGGCTTACTGGAGAGGTCGACATAGACCTAAGAAGACCATAGGTGCAACTAACGCGACAACAGCTCCACA  
TATCATTGTTGCCACTAGGAAATTCTGATCGACCGCTGGCTAGACCTTAATAGGAACAATGATACTTTCATTCT  
ACCAGAATTAACAGATAGTCCAAGGAGATTCTAGAAAACGACAGAACGACCACCACGAGATTTCCACCCAAAAG  
TAGGTCCACTCCAACATCAGCAACCGAGCCTCCTACAAAATGTATGAGGGTTCGACAACCCACCAAGGAAAT  
TAACAGATACACATTTGGATGAGGATCACAAATGCCAAAGAGTTCCCATCCAATCCGCATCGTTTAGTAGTACCATT  
CTTTAAATTAACAAAAGATGGGGAATACAGTATCGAACCTTCTCCTGAAGAAAGCCGAGTAATATAAAAAGGTT  
ACTTCAACATTTAAGAACCATGGTTGATACTACCATATATTGTCGCTTCACTGGAATTGTTTCATCAATGCATTATA  
AGTTAGATGAAGTACTATGGGAATATGATAAATTTGAATCAGCTGTAACCCTAGCAGAAGGGGAGGGTTCAGGTG  
CCTTACTACTGATCCAAAATACGGCGTTAAGAAGTTATTTTTGAATACACTTGCTACTGAACATAGTATTGAGAG  
TGAAGTGATATCAGGTTACACCACTCCAAGGATGCTACTCTCAATTATGCCTAAAACACATCGTGGTGAGCTAGA  
GGTCATATTAATAACTCAGCTAGTCAAATAACTGATATTACACACCGAGATTGGTTTTCAAATCAAAGAAATAGG  
ATTCCAAGTATGCTGATATTATTACCATGGATGCTGAAACTACAGAAAACCTTAGATCGTTCCAGATTATATGAAG  
CAGTATATACGATTATTTGTAATCATATCAATCCTAAAACCTTGAAGTGGTCATCTTAAAAGTCTTCTCAGCGAT  
TTGGATGGGATGTGCTGGATTAACAATTATCTTGCTCCTATGTTTGGATCAGGATATTTAATCAAACCTATAACAT  
CAAGTGCAAAGTCAAGTGAGTGGTATTTATGCTTATCTAATCTACTTTCAACCTTGAGAACTACTCAGCATCAAAC  
CCAGGCAAACGTCTCCATGTCGTACAATGTGCTCTTCAACAGCAAGTACAAGAGGGTCAATTGGCTAAGTCA  
TCTTACTAAATACACCACAAGTAGATTGCACAATAGTTATATTGCATTTGGTTTTCTTTCATTAGAGAAGGTCCTAT  
ATCATAGGTATAACCTTGTTGATTCGAGAAACGGACCATTAGTTTCTATAACGAGACACCTTGCCCTCCTCAAAC  
TGAGATCAGGGAGTTGGTAACTGATTATAATCAGCTGCGACAAAGTCAACCCAGACTTATCATTTATAAAAAC  
ATCCAAGGGACGGATAACTAACTAGTGAATGATTATCTAAGATTTGAGTTGGTTATACGGGGCTCTTAAAAATAAT  
TCTACATGGCACCATGAGTTATACTTGCTACCAGAACTTATAGGTGTTTCCATCGATTTAATCATAACGTAAC  
GTACATGCAGCGAAAGGTTCTGGTTCAAACCTTATATCTACACCGAATGAGTGATGCTGAGATAAAAACCTTATGG  
ACCGGCTCACCAGCCTAGTCAATATGTTTCTGAAGGTTTCAGGTCTAGTTCAGTCTAATTCTAACTGCACCAA  
GGCTCTAGAAATATTTTAAATAACCAGGTGTATATCAAAGTCAATACAAGTGTAATAAACAATATGCAAGGGACCAC  
ATTGAGGATCAGTTTATTGACTCTTCCAATACACAGAGTTGGAAGCACCGATTCAAGGTTTCTAAGACGCTCTAT  
CAATTATGTTGATAATGTAAATAATAGCTTTTCTGCCTATTATGACTTAAATAAACATATCTATAACGACCATCACA  
GCTAAGTCGTTGCCCTAGTTTATATATTAATAAATTTAGAAGCTAGGTTAACTCTAATTACATAAGTATTAAGA  
AAAAATTACTAAGACTAATACTCTCATGCCAAGAACTAGTAATGTGTTTACATGACAGATTATTTCTAACACTAA  
ATTGCAATTTCAATTTTAAAGCTAAGTTTAAACACCTATACAGCCAAAATATTTATAGGGCCGATGGGAATAACAT  
AAGAGGAACATGATCAATGAACCCTTTATTCCAAGTGGCAGTTGATTGATAATCTACAAATTCATAAGATGTTT  
TTACGATATTCTTTTGTTTTAAATCTCAATGTCAATGATTTAATAAGTAATAATAAAAAAATCACATTAAGATGCA  
GGAAGATCTTGACCTCGCCAGGAAAATTAAGCGCACACAATAAATAAAAAAATCTGTATTTTCTTTTTTGGAGT  
GCACA
